# Supplementary material for: Dietary Quality during Pregnancy and Congenital Heart Defects
Source: MDPI journal article supplement (doi:10.3390/nu14173654), 2022-09-04
Supplement: s1 [file s1]

**Table S1.** The constitution of congenital heart defects subtypes in the cases.

| Subtypes                            | Number | Proportion, % |
|-------------------------------------|--------|---------------|
| Ventricular heart defects           | 222    | 46.84         |
| Septal heart defects                | 218    | 45.99         |
| Atrioventricular septal defects     | 87     | 18.35         |
| Patent ductus arteriosus            | 74     | 15.61         |
| Tetralogy of fallot                 | 29     | 6.12          |
| Pulmonary stenosis                  | 17     | 3.59          |
| Aortic valve stenosis               | 14     | 2.95          |
| Transposition of the great arteries | 7      | 1.48          |
| Single ventricle                    | 5      | 1.05          |
| Others                              | 2      | 0.42          |

A fetus with congenital heart defects may be diagnosed with two or more subtypes of congenital heart defects.

**Table S2.** Daily nutrients intakes during pregnancy by Global Diet Quality Score category among cases and controls <sup>1</sup>.

|                               | Case (N = 474)          |                         |         | Control (N = 948)       |                         |         |
|-------------------------------|-------------------------|-------------------------|---------|-------------------------|-------------------------|---------|
|                               | Quartile 1              | Quartile 4              | P       | Quartile 1              | Quartile 4              | P       |
| Total energy, kcal            | 1467.9 (1286.6, 1692.0) | 2319.8 (2098.2, 2733.1) | < 0.001 | 1395.6 (1226.6, 1578.5) | 2453.6 (2148.4, 2886.4) | < 0.001 |
| Protein, g                    | 31.5 (25.1, 41.0)       | 73.7 (64.4, 99.6)       | < 0.001 | 33.0 (26.7, 42.9)       | 81.6 (65.9, 109.6)      | < 0.001 |
| Fat, g                        | 19.3 (13.7, 30.0)       | 54.1 (40.8, 71.6)       | < 0.001 | 24.0 (18.2, 34.7)       | 58.4 (46.0, 77.9)       | < 0.001 |
| Monounsaturated fatty acid, g | 4.1 (2.6, 7.1)          | 13.1 (8.7, 19.4)        | < 0.001 | 5.8 (4.3, 8.4)          | 13.1 (9.8, 17.8)        | < 0.001 |
| Saturated fatty acid, g       | 8.6 (5.8, 13.6)         | 21.2 (17.2, 27.5)       | < 0.001 | 11.2 (8.7, 14.8)        | 23.6 (18.2, 33.7)       | < 0.001 |
| Carbohydrate, g               | 154.0 (123.7, 190.4)    | 263.0 (231.5, 317.1)    | < 0.001 | 119.6 (98.1, 144.5)     | 283.6 (224.2, 362.1)    | < 0.001 |
| Iron, mg                      | 13.8 (9.0, 17.5)        | 28.9 (23.3, 35.4)       | < 0.001 | 11.3 (8.7, 14.8)        | 29.1 (24.1, 40.9)       | < 0.001 |
| Zinc, mg                      | 3.1 (2.3, 4.3)          | 8.9 (6.8, 11.6)         | < 0.001 | 3.6 (2.9, 4.8)          | 9.2 (7.4, 12.9)         | < 0.001 |
| Selenium, µg                  | 16.0 (11.5, 22.9)       | 40.1 (32.2, 61.2)       | < 0.001 | 18.2 (14.8, 24.3)       | 43.7 (33.7, 63.5)       | < 0.001 |
| Calcium, mg                   | 302.8 (261.3, 423.2)    | 642.3 (545.5, 923.4)    | < 0.001 | 303.1 (224.0, 389.9)    | 733.7 (577.8, 973.0)    | < 0.001 |
| Niacin, mg                    | 7.5 (5.8, 9.6)          | 16.2 (11.2, 23.9)       | < 0.001 | 7.2 (5.5, 9.7)          | 18.0 (14.4, 23.8)       | < 0.001 |
| Folate, µg                    | 161.7 (147.1, 190.1)    | 280.7 (226.9, 350.1)    | < 0.001 | 168.7 (153.1, 190.2)    | 276.5 (234.1, 374.6)    | < 0.001 |
| Vitamin C, mg                 | 43.2 (30.7, 68.3)       | 122.2 (89.3, 180.0)     | < 0.001 | 47.7 (37.1, 59.2)       | 136.9 (88.5, 218.0)     | < 0.001 |

<sup>1</sup> Values are present as median (25th percentile, 75th percentile), and compared between groups by Mann–Whitney U test.

**Table S3.** Daily nutrients intakes during pregnancy by Mediterranean Diet Score category among cases and controls <sup>1</sup>.

|                               | Case (N = 474)          |                         |          | Control (N = 948)       |                         |          |
|-------------------------------|-------------------------|-------------------------|----------|-------------------------|-------------------------|----------|
|                               | Quartile 1              | Quartile 4              | <i>P</i> | Quartile 1              | Quartile 4              | <i>P</i> |
| Total energy, kcal            | 1418.3 (1243.6, 1622.7) | 2274.0 (1934.5, 2623.5) | < 0.001  | 1361.9 (1206.5, 1535.5) | 2445.8 (2078.9, 2866.4) | < 0.001  |
| Protein, g                    | 30.3 (23.6, 39.4)       | 69.7 (56.2, 88.1)       | < 0.001  | 31.6 (25.4, 39.0)       | 80.3 (63.5, 104.4)      | < 0.001  |
| Fat, g                        | 18.6 (13.6, 26.4)       | 51.2 (36.5, 67.6)       | < 0.001  | 22.9 (17.5, 31.0)       | 57.5 (44.4, 79.4)       | < 0.001  |
| Monounsaturated fatty acid, g | 3.6 (2.5, 6.1)          | 13.1 (8.1, 18.3)        | < 0.001  | 5.3 (4.0, 7.4)          | 13.3 (9.7, 18.6)        | < 0.001  |
| Saturated fatty acid, g       | 8.3 (6.3, 11.4)         | 19.0 (15.5, 25.7)       | < 0.001  | 10.4 (8.2, 14.5)        | 22.8 (17.7, 33.9)       | < 0.001  |
| Carbohydrate, g               | 138.3 (115.5, 174.5)    | 248.6 (214.3, 303.9)    | < 0.001  | 116.6 (93.2, 142.1)     | 275.2 (212.3, 353.5)    | < 0.001  |
| Iron, mg                      | 12.3 (7.6, 16.5)        | 25.8 (20.6, 33.4)       | < 0.001  | 11.3 (8.6, 14.9)        | 28.5 (22.2, 37.9)       | < 0.001  |
| Zinc, mg                      | 2.7 (2.1, 3.8)          | 8.4 (6.5, 10.7)         | < 0.001  | 3.4 (2.8, 4.3)          | 9.1 (7.1, 12.5)         | < 0.001  |
| Selenium, µg                  | 15.1 (11.3, 20.6)       | 36.1 (26.8, 49.7)       | < 0.001  | 17.6 (13.8, 23.1)       | 43.2 (32.9, 60.1)       | < 0.001  |
| Calcium, mg                   | 295.6 (246.8, 365.0)    | 633.0 (511.6, 813.3)    | < 0.001  | 378.2 (312.0, 465.8)    | 710.5 (562.3, 927.0)    | < 0.001  |
| Niacin, mg                    | 7.3 (5.3, 9.3)          | 14.9 (10.3, 19.7)       | < 0.001  | 7.1 (5.2, 9.1)          | 17.3 (14.0, 22.5)       | < 0.001  |
| Folate, µg                    | 155.4 (144.3, 173.1)    | 274.9 (223.6, 326.4)    | < 0.001  | 165.9 (151.9, 184.4)    | 270.0 (232.0, 360.8)    | < 0.001  |
| Vitamin C, mg                 | 39.3 (28.2, 51.0)       | 118.0 (81.2, 183.4)     | < 0.001  | 45.8 (36.8, 56.5)       | 119.7 (82.0, 200.7)     | < 0.001  |

<sup>1</sup> Values are present as median (25th percentile, 75th percentile), and compared between groups by Mann–Whitney U test.

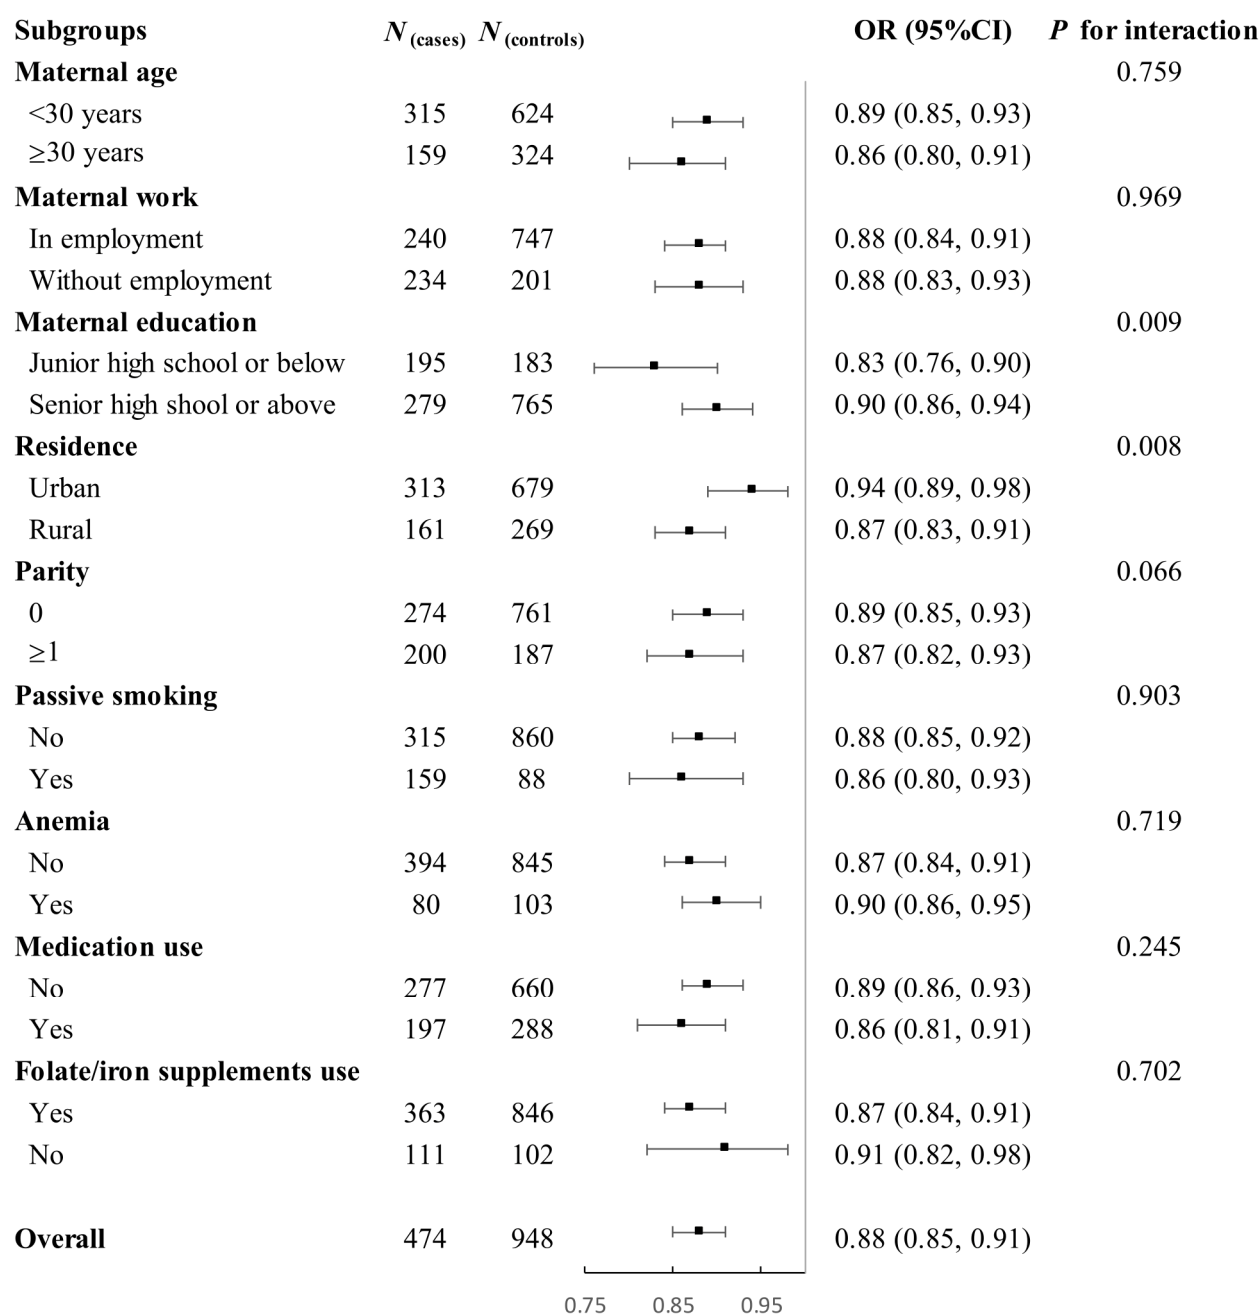

**Figure S1.** Subgroup analyses for the risk of total congenital heart defects associated with per 1 higher score of the Global Diet Quality Score.

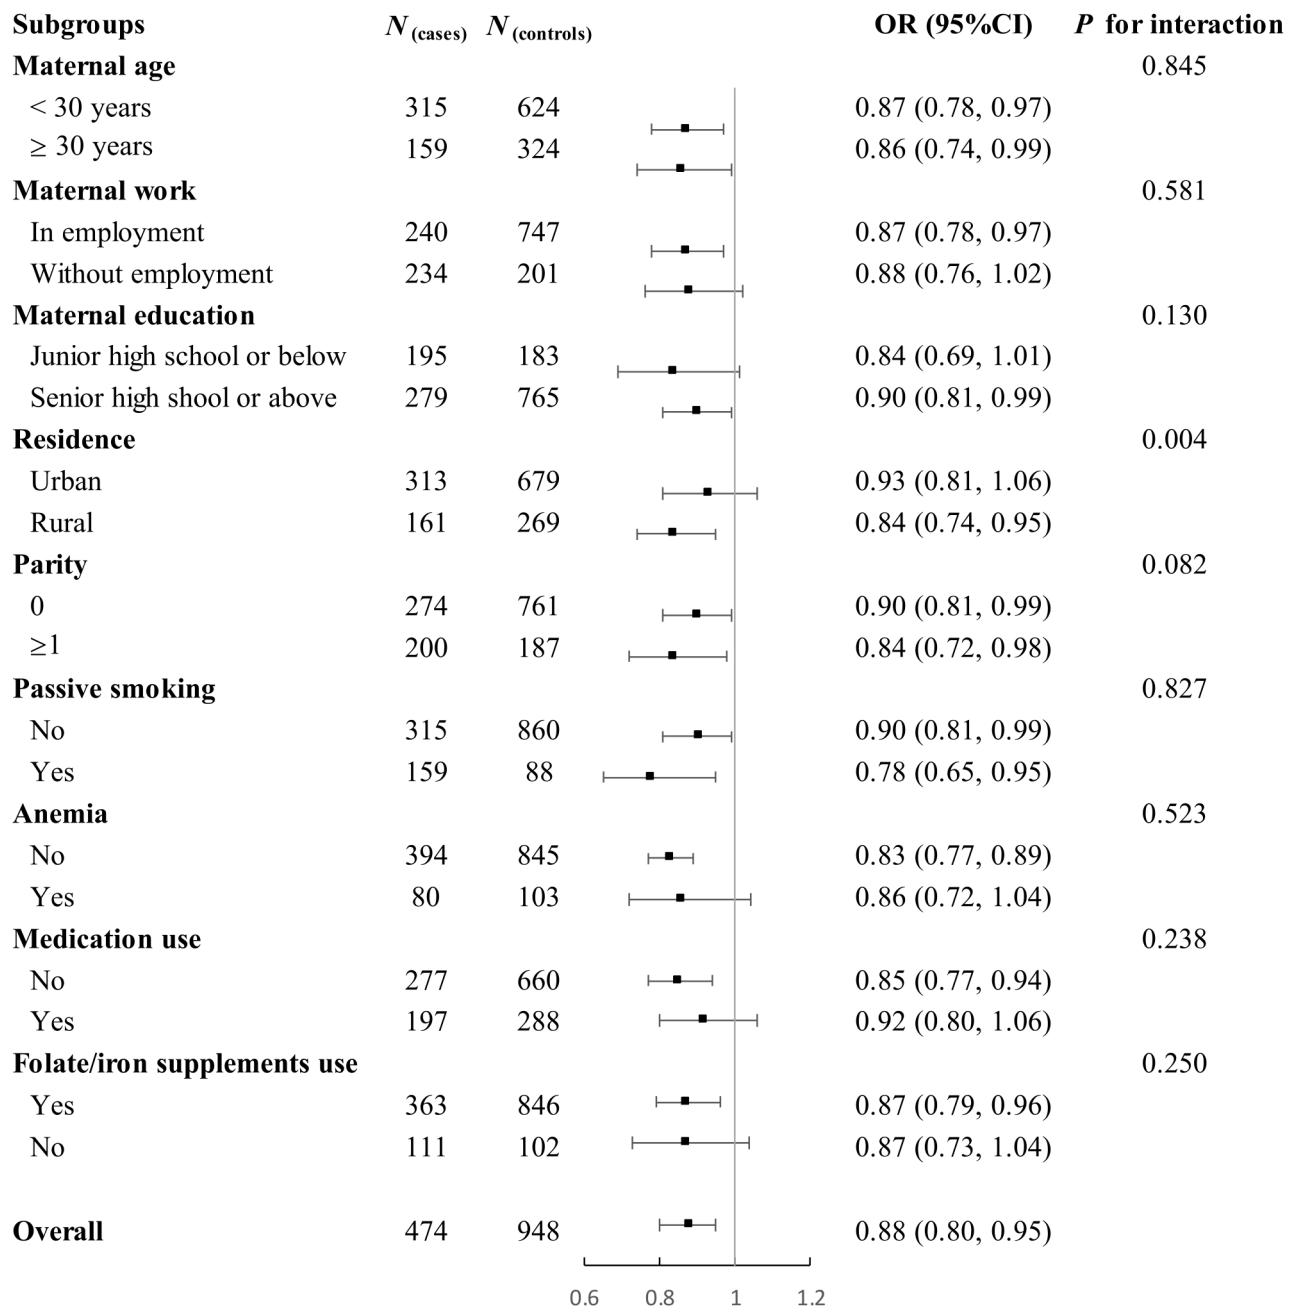

**Figure S2.** Subgroup analyses for the risk of total congenital heart defects associated with per 1 higher score of the Mediterranean Diet Score.
